# Supplementary material for: Theoretical studies of multiple bonds in gallium–gallium and germanium–germanium compounds †
Source: Royal Society of Chemistry journal article supplement (doi:10.1039/a907421j), 2000-01-01
Supplement: a907421j.doc [file a907421j.doc]

**Theoretical Studies of Multiple Bonds in Gallium–Gallium**

**and Germanium–Germanium Compounds**

Thomas L. Allen*, William H. Fink, and Philip P. Power

Department of Chemistry, University of California, Davis, CA 95616-5295

**Supplementary Information**

9/07421J

**Results**

The following states were studied. Important structural parameters are listed. Bond lengths are in Å. First data are SCF or UHF, second are MP2 or UMP2 in parentheses. All results were obtained with a 6-31G* basis set.

1. *trans*- Li2MeGaGaMe. C2h symmetry. Lower-energy configuration.

GaGa, 2.388 (2.391). GaC, 2.033 (2.039). CHa, 1.086 (1.094). CHb, 1.088 (1.095).

GaLi, 2.739 (2.715). LiLi, 4.930 (4.874). GaGaC, 132.5° (133.1°). GaCHa, 112.2° (111.6°). GaCHb, 111.2° (110.7°). HbCGaGa, ±120.7° (±120.6°).

One imaginary frequency, 13i; (no imaginary frequencies).

2. *trans*- Li2MeGaGaMe. C2h symmetry. Higher-energy configuration by 0.3 (0.7) kJ mol_1.

GaGa, 2.387 (2.392). GaC, 2.034 (2.040). CHa, 1.088 (1.095).

CHb, 1.087 (1.094). GaLi, 2.741 (2.717). LiLi, 4.935 (4.880). GaGaC, 132.6° (133.4°). GaCHa, 110.3° (109.6°). GaCHb, 112.4° (111.9°).

HbCGaGa, ±60.4° (±60.3°).

Two imaginary frequencies at 30i and 15i (42i and 36i).

3. "Linear" Li2MeGaGaMe. C2h symmetry. Higher than 1 (low-energy trans configuration) by 31.3 (36.7) kJ mol–1.

GaGa, 2.161 (2.203). GaC, 1.989 (2.000). CHa, 1.084 (1.092). CHb, 1.085 (1.092).

GaLi, 2.708 (2.700). LiLi, 4.966 (4.931). GaGaC, 180.0° (180.0°). GaCHa, 111.2°

(110.6°). GaCHb, 110.9° (110.2°). HaCCHb, ±59.6° (±59.6°).

Three imaginary frequencies at 61i, 25i, and 25i (81i, 60i, and 25i).

4. *bent* - Li2MeGaGaMe. Cs symmetry. State of lowest energy, 3.5 (0.8) kJ mol–1 below structure 1.

The Li cations lie above and below point X in the SCF geometry, and point (X) in the MP2 geometry.

GaGa, 2.330 (2.384). Ga1C3, 2.015 (2.051). Ga2C4, 2.013 (2.026).

C3H5, 1.088 (1.095). C3H6,7, 1.087 (1.095). C4H8, 1.085 (1.094).

C4H9,10, 1.086 (1.094). Ga1Li, 3.077 (2.767). Ga2Li, 2.619 (2.676).

LiLi, 4.149 (4.702). Ga2Ga1C3, 153.6° (133.6°). Ga1Ga2C4, 128.9° (133.2°).

Ga1C3H5, 112.7° (112.4°). Ga1C3H6,7, 110.8° (110.6°). Ga2C4H8, 111.7° (110.3°). Ga2C4H9,10, 110.8° (111.1°). Ga1Ga2C4H9,10, ±59.6° (±59.9°). Ga2Ga1C3H6,7, ±120.4° (±120.8°). H5C3Ga1Li, ±44.8° (±59.2°).

H8C4Ga2Li, ±77.6° (±98.1°).

No imaginary frequencies; (no imaginary frequencies).

5. *trans* - MeGaGaMe. C2h symmetry. Lower-energy conformer.

GaGa, 2.654 (2.560). GaC, 2.017 (2.017). CHa, 1.087 (1.094). CHb, 1.089 (1.096).

GaGaC, 123.0° (125.2°). GaCHa, 111.6° (111.6°). GaCHb, 111.2° (110.6°).

GaGaCHa, 180.0° (180.0°). GaGaCHb, ±59.7° (±59.3°).

No imaginary frequencies; (no imaginary frequencies).

6. *trans* - MeGaGaMe. C2h symmetry. Higher-energy configuration [higher than 5 by 3.7 (4.6) kJ mol_1].

GaGa, 2.676 (2.566). GaC, 2.019 (2.020). CHa, 1.086 (1.093). CHb, 1.089 (1.096).

GaGaC, 123.9° (126.8°). GaCHa, 113.3° (113.2°). GaCHb, 110.4° (109.8°).

GaGaCHa, 0.0° (0.0°). GaGaCHb, ±121.0° (±121.1°).

Two imaginary frequencies at 88i and 85i (100i and 96i).

7. *trans* - MeGaGaMe+ cation. C2h symmetry. Lower-energy configuration. Same linkage and conformation as 5.

GaGa, 2.476 (2.460). GaC, 1.959 (1.959). CHa, 1.083 (1.092). CHb, 1.086 (1.095).

GaGaC, 148.71° (152.1°). GaCHa, 110.6° (109.9°). GaCHb, 110.0° (109.7°).

GaGaCHa, 180.0° (180.0°). GaGaCHb, ±59.6° (±59.6°).

No imaginary frequencies; (no imaginary frequencies).

8. *trans* - MeGaGaMe+ cation. C2h symmetry. Higher-energy configuration

[higher than 7 by 1.0 (1.4) kJ mol_1]. Same linkage and conformation as 6.

GaGa, 2.466 (2.447). GaC, 1.959 (1.959). CHa, 1.084 (1.093). CHb, 1.085 (1.094).

GaGaC, 150.6° (154.4°). GaCHa, 111.5° (111.5°). GaCHb, 109.5° (108.8°).

GaGaCHa, 0.0° (0.0°). GaGaCHb, ±120.8° (±120.9°).

Two imaginary frequencies at 49i and 42i (65i and 54i).

9. *trans*- MeGeGeMe. C2h symmetry. Lower-energy configuration.

GeGe, 2.167 (2.197). GeC, 1.962 (1.968). CHa, 1.084 (1.092). CHb, 1.082 (1.091).

GeGeC, 130.9° (129.9°). GeCHa, 109.6° (109.2°). GeCHb, 110.1° (109.6°).

GeGeCHa, 180.0° (180.0°). GeGeCHb, ±60.6° (±60.6°).

One imaginary frequency, 51i; (no imaginary frequencies).

10. *trans*- MeGeGeMe. C2h symmetry. Higher-energy configuration by 0.2 (1.2) kJ mol_1.

GeGe, 2.171 (2.200). GeC, 1.962 (1.968). CHa, 1.083 (1.093). CHb, 1.083 (1.091).

GeGeC, 130.5° (129.7°). GeCHa, 109.1° (108.3°). GeCHb, 110.4° (110.1°).

GeGeCHa, 0.0° (0.0°). GeGeCHb, ±119.6° (±119.4°).

One imaginary frequency, 55i; (two imaginary frequencies, at 48i and 45i).

11. "Linear" MeGeGeMe. D3d symmetry. Higher than 9 (low-energy trans

configuration) by 63.6 (78.0) kJ mol–1.

GeGe, 2.014 (2.073). GeC, 1.932 (1.939). CH, 1.081 (1.090).

GeGeC, 180.0° (180.0°). GeCH, 109.5° (109.1°).

One doubly-degenerate imaginary frequency, 138i (176i).

12. *twist* - MeGeGeMe. C2 symmetry. 32.5 kJ mol_1 below 9 (low-energy *trans*

structure); (22.8 kJ mol–1 above 9).

GeGe, 2.458 (2.365). GeC, 2.017 (2.083). CHa, 1.084 (1.093). CHb, 1.090 (1.094).

CHc, 1.087 (1.111). GeGeC, 88.3° (70.3°). GeCHa, 109.6° (105.0°).

GeCHb, 105.1° (103.9°). GeCHc, 118.4° (124.3°).

CGeGeC, 90.6° (92.8°).

GeGeCHa, 219.8° (-123.6°). GeGeCHb, 104.8° (120.8°). GeGeCHc, -15.0° (-1.0°).

No imaginary frequencies; (no imaginary frequencies).

13. "Planar" *trans* - MeHGaGaHMe. C2h symmetry. Lower-energy configuration.

GaGa, 2.510 (2.515). GaC, 1.996 (1.999). GaH, 1.589 (1.600).

CHa, 1.085 (1.092). CHb, 1.089 (1.096). GaGaC, 122.6° (122.3°).

GaGaH, 120.9° (121.1°). GaCHa, 113.3° (113.3°). GaCHb, 110.6° (110.2°).

GaGaCHa, 180.0° (180.0°). GaGaCHb, ±58.7° (±58.5°).

CGaGaH, 0.0° (0.0°).

One imaginary frequency, 41i (50i).

14. "Planar" *trans* - MeHGaGaHMe. C2h symmetry. Higher-energy configuration by 1.4 (0.7) kJ mol_1.

GaGa, 2.511 (2.514). GaC, 1.995 (1.997). GaH, 1.590 (1.600).

CHa, 1.085 (1.092). CHb, 1.089 (1.096). GaGaC, 124.6° (124.4°).

GaGaH, 120.7° (120.7°). GaCHa, 113.5° (113.4°). GaCHb, 110.5° (110.1°).

GaGaCHa, 0.0° (0.0°). GaGaCHb, ±121.3° (±121.4°).

CGaGaH, 0.0° (0.0°).

Three imaginary frequencies at 57i, 55i, and 41i (50i, 45i, and 40i).

15. "Planar" *trans*-MeHGeGeHMe. C2h symmetry. Lower-energy configuration.

GeGe, 2.187 (2.218). GeC, 1.946 (1.947). GeH, 1.530 (1.544).

CHa, 1.083 (1.092). CHb, 1.083 (1.092). GeGeC, 124.7° (124.1°).

GeGeH, 120.5° (119.9°). GeCHa, 109.8° (109.3°). GeCHb, 110.6° (110.4°).

HbCGeGe, ±119.8° (±119.7°).

One imaginary frequency, 95i (160i).

16. "Planar" *trans*-MeHGeGeHMe. C2h symmetry. Higher-energy configuration by 5.9 (4.9) kJ mol_1.

GeGe, 2.187 (2.218). GeC, 1.952 (1.953). GeH, 1.529 (1.543).

CHa, 1.084 (1.092). CHb, 1.082 (1.091). GeGeC, 124.8° (124.3°).

GeGeH, 120.3° (120.0°). GeCHa, 110.5° (110.2°). GeCHb, 110.2° (109.9°).

HbCGeGe, ±60.2° (±60.2°).

Three imaginary frequencies at 172i, 107i, and 23i (214i, 100i, and 69i).

17. Digermane, Ge2H6. D3d symmetry.

GeGe, 2.417 (2.415). GeH, 1.543 (1.554).

GeGeH, 110.5° (110.5°).

No imaginary frequencies; (no imaginary frequencies).

18. Methyleneimine, H2CNH. Cs symmetry.

CN, 1.250 (1.282). CHa, 1.080 (1.089). CHb, 1.084 (1.095). NH, 1.006 (1.027).

NCHa, 119.3° (118.4°). NCHb, 124.7° (125.5°). CNH, 111.5° (109.7°).

No imaginary frequencies; (no imaginary frequencies).

19. Methyleneimine cation, H2CNH+. Cs symmetry. Same linkage as 18.

CN, 1.243 (1.229). CHa, 1.080 (1.096). CHb, 1.084 (1.101). NH, 1.010 (1.024).

NCHa, 119.2° (120.0°). NCHb, 119.3° (120.0°). CNH, 148.66° (150.7°).

No imaginary frequencies; (no imaginary frequencies).

Table 2. Absolute energies of model compounds (in hartrees)a

|  | Molecule | HaCMMb  dihedral angle | Energy |
| --- | --- | --- | --- |
|  | trans-Li2MeGaGaMe, str 1 | 0.0 | -3936.58580  -3937.00153 |
|  | trans-Li2MeGaGaMe, str 2 | 180.0 | -3936.58567  -3937.00128 |
|  | "linear" Li2MeGaGaMe | -- | -3936.57388  -3936.98755 |
|  | bent Li2MeGaGaMe | 180.0, 0.0 | -3936.58715  -3937.00182 |
|  | trans-MeGaGaMe, str 2 | 180.0 | -3921.65570  -3922.01773 |
|  | trans-MeGaGaMe, str 1 | 0.0 | -3921.65427  -3922.01598 |
|  | trans-MeGaGaMe+, str 2 | 180.0 | -3921.46526  -3921.80032 |
|  | trans-MeGaGaMe+, str 1 | 0.0 | -3921.46489  -3921.79978 |
|  | trans-MeGeGeMe, str 2 | 180.0 | -4225.66557  -4226.10095 |
|  | trans-MeGeGeMe, str 1 | 0.0 | -4225.66547  -4226.10049 |
|  | "linear" MeGeGeMe | -- | -4225.64133  -4226.07124 |
|  | twist MeGeGeMe | -- | -4225.67794  -4226.09228 |
|  | trans-MeHGaGaHMe, str 2 | 180.0 | -3922.84083  -3923.20458 |
|  | trans-MeHGaGaHMe, str 1 | 0.0 | -3922.84028  -3923.20432 |
|  | trans-MeHGeGeHMe, str 1 | 0.0 | -4226.86205  -4227.28703 |
|  | trans-MeHGeGeHMe, str 2 | 180.0 | -4226.85979  -4227.28516 |

aUpper data are SCF or UHF, lower are MP2 or UMP2.

bHa is the hydrogen atom bonded to C and lying in the CMMC plane.
